1 Experimental sexual selection reveals rapid divergence in male and female reproductive  
2 transcriptomes and their interactions

3

4 Paris Veltsos<sup>1</sup>, Damiano Porcelli<sup>2</sup>, Yongxiang Fang<sup>3</sup>, Andrew R. Cossins<sup>4</sup>, Michael G. Ritchie<sup>5</sup>,  
5 Rhonda R. Snook<sup>6\*</sup>

6

7 <sup>1</sup>Department of Ecology and Evolutionary Biology, University of Kansas, Lawrence, KS, USA. Orcid  
8 0000-0002-8872-6281

9 <sup>2</sup>Department of Animal and Plant Sciences, University of Sheffield, Sheffield UK. Orcid: 0000-0002-  
10 9019-5758

11 <sup>3</sup>CGR, Institute of Infection, Veterinary and Ecological Sciences, University of Liverpool, Liverpool,  
12 L69 7ZB, UK. Orcid 0000-0002-4514-5292

13 <sup>4</sup>Centre for Genomic Research, Institute for Integrative Biology, University of Liverpool, Liverpool  
14 UK. Orcid 0000-0002-0813-5212

15

16 <sup>5</sup>Centre for Biological Diversity, University of St Andrews, St Andrews, Fife, Scotland KY16 9TH, UK.  
17 Orcid 0000-0001-7913-8675

18 <sup>6</sup>Department of Zoology, Stockholm University, Stockholm 106 91 Sweden. Orcid 0000-0003-1852-  
19 1448

20 \*corresponding author

21

22

23

24 **Abstract**

25 Mating causes substantial changes in females, altering male and female reproductive fitness.  
26 Some postmating effects are hypothesized to be at least partially mediated by gene expression  
27 changes, driven by postcopulatory sexual selection, which results in population divergence of  
28 reproductive proteins that could generate reproductive isolation. However, understanding of the  
29 direct role of sexual selection on gene expression divergence along with the subsequent molecular  
30 mismatches that could occur between diverging populations is limited. Here, we analyze gene  
31 expression divergence following over 150 generations of experimental evolution in which  
32 *Drosophila pseudoobscura* evolved under either elevated polyandry or enforced monogamy. We  
33 find that sexual selection rapidly impacted sex-, tissue-, and mating-specific responses, and not  
34 always in the predicted direction. Postmating female responses are either unique to each sexual  
35 selection treatment or exhibit asymmetric non-congruence, in which monogamy females  
36 upregulate and polyandry females downregulate the same genes following mating. This substantial  
37 population divergence of gene expression also gives rise to either unique or mismatched gene  
38 expression patterns in crosses between treatments. Many of these genes are involved in immune  
39 and stress responses, and non-congruent responses are particularly prevalent in the female  
40 reproductive tract, the main arena for postcopulatory sexual selection. In summary, we show that  
41 sexual selection has pervasive impacts on gene expression divergence acting both differentially  
42 between reproductive tissues of the same sex and asymmetrically in postmating female  
43 responses, and this divergence is highest in the female reproductive tract, the main arena for  
44 postcopulatory sexual selection.

45 Keywords: postmating response, postmating prezygotic reproductive isolation, RNA-seq, testes,  
46 accessory glands, female reproductive tract.

47

## 48 Introduction

49 Sexual reproduction involves pre-ejaculatory and post-ejaculatory interactions between the sexes  
50 with sexual selection influencing male and female traits that mediate the fitness outcome of these  
51 interactions. While aspects of reproduction can be cooperative, the sexes also diverge over the  
52 optima of reproductive traits, such as courtship signals, fertilization and offspring production. The  
53 intensity of sexual selection is linked to the extent to which reproductive fitness optima differ  
54 between the sexes and can generate sexual antagonism, in which selection acts in opposing  
55 directions on the sexes (Rice, 1996; Holland and Rice, 1999). As the sexes share the majority of  
56 their genome, intra-locus sexual conflict can occur over phenotypes that are influenced by these  
57 shared genes. Resolving this conflict can occur by the evolution of sexual dimorphism, mediated  
58 by changes in the shared genome, such as sex-specific regulation of gene expression (Mank  
59 2017). Comparative genomic studies have found that genes with rapid divergence and that show  
60 stronger signatures of positive divergent selection are often sex-biased or sex-limited in expression  
61 (e.g. Cheng *et al.* 2016; Pröschel *et al.*, 2006; Ellegren & Parsch, 2007; Zhang *et al.*, 2007). This  
62 pattern is sometimes stronger in species that have traits associated with indicators of sexual  
63 selection, such as increased sexual dimorphism (Harrison *et al.* 2015; Wright *et al.* 2019).

64 In internally fertilizing species, the main arena for post-ejaculatory molecular interactions is the  
65 female reproductive tract which includes sites of sperm transfer, storage and subsequent  
66 fertilization of eggs transiting from the ovaries. Postmating female responses are extensive,  
67 influencing female behaviour, morphology and physiology. These responses are mediated by  
68 interactions between components of the male ejaculate, including sperm produced in the testes,  
69 rapidly evolving seminal fluid proteins (Sfps) produced by accessory glands, and female  
70 reproductive proteins in the female reproductive tract and ovaries (Sirot *et al.* 2015; Oku *et al.*  
71 2019; Wolfner 2009). Postmating changes in females include altering investment in oogenesis  
72 (Wolfner 2009), remating propensity (Chapman *et al.* 2003), and sperm storage and usage (Avila  
73 *et al.* 2010; Avila *et al.* 2015). Other aspects of physiology are also altered, for example, female  
74 hunger (Carvalho *et al.* 2006), female aggression (Bath *et al.* 2017), and homeostasis (Ribeiro and  
75 Dickson 2010; Cognigni *et al.* 2011). Genes associated with immunity and stress have altered  
76 gene expression upon mating in females, which may impact susceptibility or resistance to  
77 pathogens and/or parasites (Oku *et al.* 2019; Zhong *et al.* 2013).

78 An increasing number of studies have characterized transcriptomic postmating changes and used  
79 gene ontology to determine the associated gene functions, although many studies typically  
80 examine either whole bodies or abdomens of females (Lawniczak and Begun 2004; McGraw *et al.*  
81 2004, 2008, Innocenti and Morrow 2009; Innocenti *et al.* 2014; Hollis *et al.* 2014, 2016; Delbare *et al.*  
82 2017; Fowler *et al.* 2019) or examine only one component of the female reproductive tract  
83 (“lower” reproductive tract, defined by the female sperm storage organs, Mack *et al.* 2006,

84 Prokupek *et al.* 2008; or the “upper” reproductive tract, defined by the oviducts, Kapelnikov *et al.*  
85 2008). No study has simultaneously assessed postmating effects on the sperm receiving  
86 components of the female reproductive tract (the uterus and sperm storage organs) and the egg  
87 production components (oviducts and ovaries). Receipt of the male ejaculate effects sperm  
88 storage dynamics, oogenesis and oviposition (Sirot *et al.* 2015) so all are subject to sexual  
89 selection (and sexual conflict). Likewise, for males, the main focus on the role of sexual selection  
90 and sexual conflict has been on Sfp evolution given that they are among the most rapidly evolved  
91 proteins known (Ahmed-Braimah *et al.* 2017; Ellegren and Parsch 2007), although sperm and the  
92 cellular architecture of the testes also can be subject to rapid morphological evolution and sexual  
93 selection (Lüpold *et al.* 2009).

94 The reproductive interactions between the sexes, by generating strong postmating sexual selection  
95 and sexual conflict, also cause rapid evolutionary changes between lineages which may lead to  
96 reproductive isolation (Markow 1997; Manier *et al.* 2013; Ahmed-Braimah *et al.* 2020). In particular,  
97 postmating prezygotic (PMPZ) reproductive isolation in which gametes do not interact properly  
98 prior to fertilization (Ahmed-Braimah *et al.* 2017; Garlovsky *et al.* 2020) or affect egg production  
99 (Matute and Coyne 2010) may evolve due to mismatches between lineages in male ejaculate-  
100 female reproductive tissue interactions (Ahmed-Braimah *et al.* 2020). Direct evidence of any  
101 consequences of rapid evolutionary divergence between male and female reproductive processes  
102 and the generation of PMPZ isolation is lacking. Some studies have examined the postmating  
103 gene expression responses in females mating to either con- or hetero- specific males to assess  
104 evidence for mismatches to understand how PMPZ isolation occurs (Bono *et al.* 2011; Ahmed-  
105 Braimah *et al.* 2020). However, in most cases, these lineages are quite distinct, representing  
106 different species, and the sexual selection history is unknown.

107  
108 Experimental sexual selection, in which populations are subjected to either polyandrous conditions  
109 that facilitates sexual selection or enforced monandrous conditions that eliminate sexual selection,  
110 has been used to examine the evolution of gene expression responses to sexual selection, and  
111 link these to macroevolutionary patterns of sex-biased and sex-limited gene expression evolution  
112 (Hollis *et al.* 2014, 2016; Immonen *et al.* 2014; Veltsos *et al.* 2017). Previous studies supported the  
113 role of sexual selection in divergent sex-biased gene expression, but whether male- or female-  
114 biased genes responded the most depended on species (Hollis *et al.* 2014; Immonen *et al.* 2014;  
115 Veltsos *et al.* 2017; Parker *et al.* 2019; Hollis *et al.* 2019). Additionally, these studies were limited in  
116 that postmating responses and/or sex-specific tissue responses were rarely examined.  
117 Consequently, the understanding of how sexual selection impacts sex-limited and reproductive  
118 tissue-specific gene expression, the consequences of this divergence on postmating responses,  
119 and the opportunity for this divergence to trigger barriers to reproduction is limited.

120 In this study, we use replicate populations of *D. pseudoobscura* following over 150 generations of  
121 experimental evolution in which either monandry is enforced (referred to as M), eliminating sexual  
122 selection and conflict, or elevating the opportunity for polyandry (referred to as E). We take a  
123 quantitative transcriptomics approach to investigate the impact of sexual selection on gene  
124 expression divergence. We separate the effects between different reproductive tissues of males  
125 (testes and accessory glands) and females (female reproductive tract and ovaries), and examine  
126 the postmating response within the separate female reproductive tissues to determine whether  
127 sexual selection acts on these similarly or differently. This approach also allows us to polarize the  
128 direction of postmating gene expression changes arising from variation in sexual selection intensity  
129 to then compare the female postmating response when mating occurs between individuals of the  
130 different sexual selection treatments. Previous work on these populations has documented the  
131 action of sexual selection and sexual conflict on phenotypic reproductive interactions between the  
132 sexes (Crudgington *et al.* 2005; 2009; 2010; Debelle *et al.* 2014; Debelle *et al.* 2016; Snook *et al.*  
133 2005), including those that could influence postmating responses. For example, changes in  
134 accessory gland investment (Crudgington *et al.* 2009) of males and ovariole number and  
135 subsequent offspring production in females (Crudgington *et al.* 2010; Immonen *et al.* 2014). Sex-  
136 biased gene expression evolution has also occurred but previous studies of expression divergence  
137 either examined whole bodies of only one sex (Immonen *et al.* 2014) or in heads and abdomens of  
138 each sex, but not following mating (Veltos *et al.* 2017).

## 139 **Results**

### 140 **Gene expression divergence in male tissues**

141 Previous work has hypothesized that monandry selects for downregulation and polyandry selects  
142 for upregulation of genes expressed in male reproductive tissues in the abdomen of *D.*  
143 *melanogaster* (Hollis *et al.* 2016). We found that virgin male testes had 359 differentially expressed  
144 genes, of which 161 were upregulated in polyandry (or downregulated in monandry) and 198  
145 upregulated in monandry (or downregulated in polyandry; Figure 1a). While marginally significantly  
146 different ( $\chi^2 = 3.81$ ,  $df = 1$ ,  $p = 0.051$ ) the gene expression pattern is in the opposite direction to  
147 that predicted. The genes upregulated under polyandry were enriched for biological processes  
148 (BP) related to stress responses, such as double strand break repair, cellular response to UV, and  
149 terpenoid metabolic process (Supplementary File 1). In contrast, genes upregulated in monandry  
150 males were related to biological processes (BP) of proteolysis, digestion and the innate immune  
151 response (Supplementary File 1).

152 In male accessory glands, 80 genes were differentially expressed between sexual selection  
153 treatments, with 34 genes upregulated in polyandry males (Figure 1a) and 46 upregulated in  
154 monandrous males. While the number of DE genes did not differ between sexual selection  
155 treatments ( $\chi^2=1.8$ ,  $p=0.18$ ), the proportion of DE genes was higher among all genes expressed in

156 accessory glands than all genes expressed in testes (0.031 vs 0.007;  $\chi^2=179.32$ ,  $df=1$ ,  $p<0.001$ ).  
157 The 34 accessory gland genes with higher expression under polyandry were enriched for BP terms  
158 related to eggshell chorion assembly, development, and neuropeptide signaling (Supplementary  
159 File 1). The 46 genes upregulated in monandry males were enriched for the BP term “detection of  
160 chemical stimulus involved in sensory perception” (Supplementary File 1).

161 Sfps are some of the most rapidly evolving proteins, hypothesized to be in response to sexual  
162 selection. To examine whether Sfps were more likely to be upregulated in polyandrous males  
163 (Hollis *et al.* 2016), we compared expression levels between the sexual selection treatments of  
164 different sets of accessory gland proteins recently described for *D. pseudoobscura* (Karr *et al.*  
165 2019). Karr and colleagues identified 3281 proteins produced in the accessory gland (the  
166 accessory gland “proteome”), of which 528 had protein secretory signals (the “secretome”) and  
167 163 were orthologous to *D. melanogaster* seminal fluid proteins (putative Sfps; also referred to as  
168 the “exoproteome”). In contrast to the prediction, we found that monandry males had higher overall  
169 expression of secretome proteins compared to polyandry males ( $W=21345000$ ,  $p<0.001$ ; Figure  
170 2a) and there were no significant treatment effects on the proteome or Sfps. However, of the 80  
171 accessory gland genes that were differentially expressed between treatments, we found a non-  
172 significant trend towards higher expression in polyandry males (Figure 2b).

173 Overall, while relatively more gene expression changes were found in the accessory glands than  
174 testes, we found a weak trend for monandry males to have higher expression in both the testes  
175 and accessory glands relative to polyandry males, including accessory gland genes with secretory  
176 function.

### 177 **Gene expression divergence in virgin female tissues**

178 Virgin female reproductive tracts had 120 differentially expressed genes, 66 (54) of which were  
179 upregulated in polyandry (monoandry) females (Figure 1b), a nonsignificant difference ( $\chi^2 = 1.2$ ,  $df$   
180  $= 1$ ,  $p = 0.27$ ). The 66 genes upregulated under polyandry were enriched in GO terms associated  
181 with the immune system and egg production, such as egg activation whereas the 54 genes  
182 upregulated under monandry were enriched for multicellular reproduction biological processes  
183 (Supplementary File 1).

184 Virgin ovaries had 417 differentially expressed genes between the sexual selection treatments  
185 (Figure 1b), with significantly more genes upregulated in polyandry (299) than in monandry (118)  
186 ( $\chi^2 = 78.6$ ,  $df = 1$ ,  $p < 0.001$ ). The proportion of DE genes in ovaries was significantly greater than  
187 that in FRT (0.040 vs 0.014;  $\chi^2=120.1$ ,  $df=1$ ,  $p<0.001$ ). Upregulated polyandry genes were  
188 enriched in BP terms associated with eggshell chorion assembly whereas upregulated genes in  
189 monandry ovaries were enriched for negative regulation of BMP signaling pathway  
190 (Supplementary File 1).



191 Thus, we find that the female reproductive tissues do not respond similarly to the sexual selection  
192 treatment, with the ovaries showing more gene regulation divergence in response to sexual  
193 selection treatment than the reproductive tract. The biological processes associated with  
194 differentially expressed genes also differed between sexual selection treatment and tissues.

### 195 **Sexual selection causes divergence in the female postmating response**

196 Sexual selection is thought to result in rapid divergence of the postmating female response. Above,  
197 we show that, in virgins, different male and female reproductive tissues have different responses to  
198 sexual selection which sets the stage for divergence in postmating responses. Sexual selection  
199 treatment did not affect the total number of genes involved in the female postmating response in  
200 the reproductive tract (n= 400 for polyandry females, n=357 for monandry females;  $\chi^2=2.4425$ ,  
201  $p=0.12$ ) (Figure S1). However, polyandry females had significantly more postmating responsive  
202 genes showing downregulation (n=246) than upregulation (n=154) after mating ( $\chi^2=21.16$ ,  
203  $p<0.001$ ), whereas monandry females showed the opposite pattern, with significantly more genes  
204 upregulated (n=233) than downregulated (n=124) after mating ( $\chi^2=33.28$ ,  $p<0.001$ ) (Figure S1). In  
205 contrast to the large number of genes involved in the postmating response of the female  
206 reproductive tract, the ovaries had relatively few genes showing expression divergence upon  
207 mating (n=23; Figure S1). Polyandry females showed significantly more differentially expressed  
208 genes (n=22) than monandry females (n=1) ( $\chi^2=19.174$ ,  $p<0.001$ ). Of the 22 genes involved in  
209 postmating divergence of polyandry ovaries, 14 were upregulated after mating and 8  
210 downregulated, not significantly different ( $\chi^2=1.64$ ,  $p=0.2$ ; Supplementary File 1).

211 For the reproductive tract, genes downregulated in polyandry females after mating were  
212 significantly enriched for metabolic related processes, eggshell chorion assembly, and immune  
213 response, whereas downregulated genes in postmating monandry females were related to terms  
214 associated with development (Supplementary File 1). Postmating upregulated genes in the  
215 polyandry female reproductive tract were significantly enriched for immune and stress responses,  
216 whereas monandry females upregulated genes related to immune response and chorion-related  
217 functions (Supplementary File 1). For the ovaries, downregulated genes in polyandry females after  
218 mating were significantly enriched for cold acclimation and synaptic target inhibition whereas the  
219 one monandry downregulated gene was related to synaptic target inhibition and motor neuron  
220 axon guidance (Supplementary File 1). Postmating upregulated genes in the polyandry female  
221 ovaries were significantly enriched for processes involved with egg production and monandry  
222 females did not significantly upregulate any ovarian genes after mating (Supplementary File 1).

### 223 **Unique and shared postmating responses between sexual selection treatments**

224 We compared shared and divergent postmating responses between the selection lines in the  
225 female reproductive tract (Figure 3a) and the ovaries (Figure 3d). In the female reproductive tract,

226 many of the genes whose expression was altered upon mating were unique to each treatment  
227 (blue (E) and yellow (M) dots, Figure 3a). However, there was a subset of genes that altered  
228 expression in both sexual selection treatments (green diamonds, Figure 3a). 86 of these genes  
229 responded congruently; that is mating resulted in both monandry and polyandry females either  
230 upregulating (n = 67) or downregulating (n = 19) those genes (purple congruent line, Fig. 3a).  
231 Shared upregulated genes were enriched for defense responses whereas downregulated genes  
232 were enriched for fatty acid elongation and chitin-based cuticle development (Supplementary File  
233 1). Intriguingly, 57 genes responding to mating were regulated non-congruently between the  
234 sexual selection treatments; that is, gene expression was altered upon mating in both monandry  
235 and polyandry females but the direction of the expression change was opposite in the sexual  
236 selection treatments (red non-congruent line, Fig. 3a). Moreover, this non-congruence was  
237 asymmetrical; only genes that were significantly upregulated after mating in monandry females, but  
238 were downregulated after mating in polyandry females, were observed. These non-congruent  
239 genes were related to chitin and melanin catabolic processes, chorion related processes, and  
240 immune responses (Supplementary File 1). In contrast, the postmating response in ovaries  
241 predominantly showed the upregulation of genes only in polyandry females and, while monandry  
242 females did not significantly alter these genes, these E genes are congruent (Figure 3d).

243

#### 244 **Matings with non-coevolved individuals affected different genes than those of the** 245 **coevolved female postmating response**

##### 246 ***Same female, different male***

247 We use the coevolved female postmating response contrasts (Figure 3a and 3d) to polarize the  
248 direction of change and assess whether gene expression differs in non-coevolved crosses. We first  
249 contrast the effect of mating on females within a sexual treatment when mated to a coevolved vs  
250 non-coevolved male ("same female, different male contrast": MM v ME and EE v EM). In the  
251 female reproductive tract, only monogamy females show differential regulation of gene expression  
252 dependent on male partner (number of DE genes = 19; Figure 3b, blue crosses; Figure S2). 18 of  
253 these genes are downregulated after monandry females mate with polyandry males. However, 17  
254 of these genes are on the non-congruent axis (Figure 3b), indicating that these genes are normally  
255 relatively downregulated after EE mating but upregulated after an MM mating (compare blue  
256 pluses on Fig. 3b with data in the lower right quadrant of Fig. 3a). Thus, a M female mating with an  
257 E male downregulates postmating response genes, which is similar to the effect of E male mating  
258 with E females. Even though this is the female reproductive tract, these genes are significantly  
259 enriched for egg production (Supplementary file 1).



260 The ovarian gene expression pattern as a result of mating with a non-coevolved male (Figure 3e)  
261 differs from the response in the female reproductive tract (Figure 3b). In the ovaries, gene  
262 expression changes when mated to non-coevolved males occur only for E females (n=88 genes;  
263 Figure S2). Nearly 100% of these genes were not differentially expressed upon mating in EE  
264 crosses (n=87; compare Figure 3d with Figure 3e). 12 genes are downregulated (Figure 3e, purple  
265 triangles), and 76 genes are upregulated (Figure 3e, yellow triangles), after an E female mates  
266 with a non-coevolved M male. Most of the genes that are upregulated in E females after mating  
267 with a M male are non-congruent. This means that the coevolved postmating response tends  
268 towards upregulation in MM and downregulation in EE. Thus, mating with M males, makes E  
269 females more M-, and less E-like. Non-coevolved upregulated genes are enriched for a variety of  
270 disparate biological processes with molecular functions of DNA and mRNA binding  
271 (Supplementary file 1). Non-coevolved downregulated genes are significantly enriched for rRNA  
272 transcription and purine ribonucleoside biosynthetic processes, both of which are involved in cell  
273 growth and proliferation (Supplementary file 1). The enriched molecular functions of these genes  
274 are associated with structural constituents of chorion (Supplementary file 1).

275

### 276 ***Different female, same male***

277 We then contrast the impact of male sexual selection treatment on the postmating female  
278 response (“different female, same male contrast”; here we compare the effect of a M female  
279 mating with an M male (MM) with a E female mating with an M male (EM); likewise we compare a  
280 E female mating with an E male (EE) with a M female mating with an E male (ME)). A large  
281 number of genes are differentially regulated in these contrasts but the effect of sexual selection  
282 treatment of the male varies across female tissues. In the female reproductive tract, mating with  
283 monandry males led to nearly 8x as many genes changing expression than mating with polyandry  
284 males (431 vs. 58;  $\chi^2=284.52$ ,  $p<0.001$ ; Figure S3). Ovarian responses were in the opposite  
285 direction such that mating with polyandry males changed expression of about 2x more genes than  
286 mating with monandry males (310 vs. 148;  $\chi^2=57.3$ ,  $p<0.001$ ; Fig. S3). Regardless of tissue or  
287 male sexual selection treatment, the majority of genes that changed in expression following a non-  
288 coevolved mating were not differentially expressed in coevolved crosses.

289 In the female reproductive tract contrast between a coevolved MM and non-coevolved EM mating,  
290 106 of 196 genes that showed downregulation when a E female mated to a M male (Figure 3c,  
291 purple pluses) were not DE in coevolved postmating responses (Figure 3a). These downregulated  
292 genes were significantly enriched for various metabolic processes, proteolysis and antimicrobial  
293 humoral response. 213 of the 235 genes that showed relatively higher expression in E females  
294 after mating with M males (Figure 3c, orange crosses) did not change expression in coevolved  
295 crosses (Figure 3a). These upregulated genes were enriched for 68 different BP terms, and

296 subsequent analysis of cellular components and molecular functions suggest changes in genes  
297 related to DNA replication. In the opposite cross, comparing the effects of a M female mating to an  
298 E male relative to a EE mating, 31 genes were downregulated and 27 genes were upregulated.  
299 Upregulated genes are enriched for immune responses and downregulated genes are enriched for  
300 ecdysone biosynthetic process and midgut development.

301 In the ovaries, because there were so few coevolved changes (Figure 3d), nearly all the ovarian  
302 gene expression changes following a non-coevolved mating with a different sexual selection line  
303 male are uniquely altered (Figure 3f). Genes downregulated in the ovary after a E female mates  
304 with a M male are enriched for redox process, vitellogenesis and tracheal system whereas genes  
305 upregulated are enriched for BP processes that have cellular components associated with the P  
306 granule and chorion. The majority of change in the ovaries were following a noncoevolved mating  
307 between a M female and E male. The 196 genes downregulated after mating are enriched for a  
308 small number of BP terms (eggshell chorion assembly, male meiosis 1, and rRNA transcription)  
309 whereas the 114 genes upregulated after mating are enriched for immunity and stress related  
310 terms.

311 While most non-coevolved gene expression changes were unique, the direction of change was  
312 sometimes along the congruent axis of coevolved responses and for other genes differential  
313 expression occurred along the non-congruent axis (Figure 3c; Figure 3f). In the female  
314 reproductive tract, significantly more genes are DE along the non-congruent axis than the  
315 congruent axis when M males mate with E females ( $X^2 = 44.73$ ,  $df = 1$ ,  $P < 0.001$ ) whereas there  
316 is no difference between non-congruent and congruent responses in the female reproductive tract  
317 when M females mate with E males. For the ovaries, non-coevolved matings with either a M or E  
318 male result in more genes with differential expression that are along the congruent axis compared  
319 to the non-congruent axis (M:  $x^2=10.28$ ,  $df=1$ ,  $p<0.001$ ; E:  $x^2=10.4$ ,  $df=1$ ,  $p=0.0012$ ).

320 Because non-congruent changes may be more likely to generate incompatibilities, we note  
321 enrichment for DE genes in that axis. In the female reproductive tract, non-congruent changes  
322 when M males mated with E females were the large number of BP terms related to DNA replication  
323 that were upregulated after mating and for E males mated with M females associated with immune  
324 responses, also upregulated after mating (Supplementary file 1). In the ovaries, non-congruent DE  
325 genes when mating with M males were enriched for only two seemingly disparate biological  
326 processes and two cellular components, 3 of which were unique terms not seen in other contrasts  
327 with EM data. Non-congruent DE genes when mating with E males are enriched for eggshell  
328 chorion assembly and rRNA transcription which were downregulated after mating.

329

330 **Discussion**

331 Understanding how sexual selection impacts the molecular basis of sexual interactions is important  
332 because it can have profound effects on sex-specific fitness and is predicted to influence the  
333 evolution of postmating prezygotic reproductive isolation. Here we combined transcriptomics with  
334 experimental evolution to determine how sexual selection affects gene regulation simultaneously in  
335 multiple sex-specific tissues in male and female virgins and in the postmating female response  
336 when mating with either males that evolved in the same or different intensity of sexual selection as  
337 the females. Our results reveal substantial gene expression divergence after only 150 generations  
338 of altered sexual selection intensity, with sexual selection affecting components of male and  
339 female reproductive tissues differentially, as well as alterations in gene expression specific to  
340 mating with non-coevolved partners.

341 An evolutionary history of polyandry previously has been suggested to select for higher expression  
342 of genes affecting sperm competition and/or showing antagonistic effects on female reproductive  
343 behavior. This hypothesis has been examined in male abdomens of *D. melanogaster* testing the  
344 effects of experimental sexual selection on gene expression of 138 Sfps (Hollis *et al.* 2016). That  
345 study found an overall lower gene expression across all Sfps in monandry-selected males, while  
346 no individual Sfp was differentially expressed. Here we separate the effects of sexual selection on  
347 evolutionary divergence in both accessory gland and testes. Testes are also subject to sexual  
348 selection via increased sperm number for male-male competition and/or in testicular architecture to  
349 support rapid sperm production (Lüpold *et al.* 2009; Pitnick *et al.* 2008). Experimental sexual  
350 selection can alter relative testes size and accessory gland size, although this varies between  
351 species, between studies of the same species, and has different fitness outcomes (Hosken *et al.*  
352 2001; Hosken and Ward 2001; Pitnick *et al.* 2001; Wigby and Chapman 2004; Linklater *et al.* 2007;  
353 Reuter *et al.* 2008; Crudgington *et al.* 2009; Hollis *et al.* 2019). Previously we found that *D.*  
354 *pseudoobscura* polyandry males had evolved larger accessory glands but not testes, and  
355 polyandry males had greater mating capacity (Crudgington *et al.* 2009). Although we found that  
356 accessory glands had proportionally more DE genes than testes, contrary to predictions, virgin  
357 monandry males had more upregulated genes both in the accessory glands and testes than  
358 polyandry males. A similar result was observed when we limited our analysis to putative *D.*  
359 *pseudoobscura* Sfps (either the secretome or Sfps with *D. melanogaster* orthologs; Karr *et al.*  
360 2019).

361 The male genes that changed in expression in response to sexual selection treatment were  
362 associated with different biological processes. In the accessory glands, polyandry males had  
363 higher expression of neuropeptides, which are diverse neuronal signaling molecules that regulate  
364 physiological processes and behaviour in animals (Elphick *et al.* 2018). Given that postmating  
365 female responses frequently involve changes in female reproductive physiology and behavior  
366 (Sirot *et al.* 2015), polyandry may generally increase investment by males in the expression of  
367 genes that profoundly alter female reproductive fitness. In contrast, monandry male accessory

368 gland genes were enriched for “detection of chemical stimulus involved in sensory perception” and,  
369 while genes encompassed by this term can evolve rapidly, they have weak fitness effects (Librado  
370 and Rozas 2016). Thus, for male responses, we see that monandry males have increased gene  
371 expression in testes and accessory glands, including putative Sfps, although distinctly enriched  
372 gene functions between sexual selection treatments suggests differences in the potential  
373 consequences on female mates.

374 In females, the reproductive tract is considered to be the main arena for postmating sexual  
375 interactions. However, the ovaries may also be subject to sexual antagonism given that they are  
376 the egg-producing structure, and the sexes can be in conflict over fecundity schedules (Arnqvist  
377 and Rowe 2005). We have previously shown that polyandry *D. pseudoobscura* females have more  
378 ovarioles than monandry females (Immonen *et al.* 2014). Using whole body microarrays, we found  
379 that genes upregulated in polyandry females are enriched in the ovary and associated with  
380 oogenesis whereas monandry females upregulated genes associated with somatic tissues and  
381 metabolism (Immonen *et al.* 2014). In virgin abdomens, RNAseq data showed sexual selection  
382 treatment affected sex-biased gene expression (Veltsos *et al.* 2017). Here we decompose  
383 responses between the female reproductive tract and the ovaries in virgin and mated monandry  
384 and polyandry females. The reproductive tract showed a similar number of differentially expressed  
385 genes between virgin polyandry and monandry females while in the ovaries more genes were  
386 upregulated under polyandry than monandry. Genes overexpressed in virgin polyandry  
387 reproductive tissues were associated with late stages of egg production (eggshell chorion  
388 assembly, egg activation), whereas the genes over-expressed in monandry reproductive tissues  
389 were associated with earlier egg production (BMP signalling pathway, involved in patterning the  
390 *Drosophila* eggshell; Niepielko *et al.* 2012). Thus polyandry females appear ready (“primed”) for  
391 fast reproduction.

392 Related to this, previous work in *D. melanogaster* based on whole body gene expression has  
393 suggested that polyandry females are poised for receipt of a manipulative ejaculate (Heifetz and  
394 Wolfner 2004; McGraw *et al.* 2004), and therefore do not have as elevated a postmating response  
395 as monandry females (Hollis *et al.* 2016). Our results partially support this prediction, dependent  
396 on female reproductive tissue. In the female reproductive tract, polyandry females downregulated  
397 more genes following mating than were upregulated, whereas monandry females showed the  
398 opposite pattern. However, in the ovaries, only polyandry females changed expression with more  
399 upregulated, than downregulated, genes and enriched for genes associated with egg production.  
400 Overall our results support an interpretation in which polyandry females are poised to receive the  
401 ejaculate and are more reproductively mature with respect to egg production.

402 Many of the postmating differentially expressed genes in the female reproductive tract are distinct  
403 between the polyandry and monandry treatments. However, some were shared across sexual

404 selection treatments. Differential expression of these genes could be either congruent (both sexual  
405 selection treatments upregulated or downregulated these genes) or non-congruent, in which  
406 monandry upregulated the postmating gene expression, whereas the same gene in polyandry  
407 females was downregulated. Both upregulated and downregulated congruent genes were related  
408 to fatty acid elongation and some upregulated congruent genes were related to stress/immune  
409 responses. Fatty acids are critical to signaling pathways and have been associated with sex  
410 pheromone synthesis and with maturation of egg follicles in *D. melanogaster* (Vrablik and Watts  
411 2013). The shared responses between sexual selection treatments suggests a shared critical  
412 postmating reproductive function. Non-congruent genes were enriched for immune response (see  
413 later) and egg production.

414 In polyandrous species, interactions between the sexes that impact fertility are thought to be  
415 particularly dynamic and coevolve, perhaps antagonistically. In turn, such coevolution may  
416 generate postmating prezygotic (PMPZ) incompatibilities between populations, contributing to  
417 reproductive isolation. Standard approaches in speciation research to identify reproductive  
418 isolation use crosses between males and females within and between populations. Several studies  
419 have compared postmating transcriptomic responses to test the hypothesis that misregulation  
420 between components in the male ejaculate and female reproductive tissues could generate PMPZ  
421 incompatibilities (Bono *et al.* 2011; Ahmed-Braimah *et al.* 2020). However, it is very difficult to infer  
422 the historical role of different evolutionary processes from patterns of contemporary divergence  
423 between species. Experimental evolution introduces fewer confounding variables but lacks the full  
424 realism of natural conditions. Previous experimental evolution work has been criticized for crossing  
425 different populations to infer the direction of sexual conflict (Pizzari and Snook, 2005; Rowe *et al.*  
426 2005). Here we can use known coevolved population differentiation in gene expression to examine  
427 the consequences on mismatches in gene expression when crossed with a non-coevolved  
428 individual. The effect of mating with a non-coevolved individual depended on whether we were  
429 contrasting the effect of either the male or female treatment, what female reproductive tissue was  
430 being analyzed, and the sexual selection treatment itself. Regardless of these factors, most of the  
431 postmating genes that were differentially expressed in non-coevolved crosses were distinct from  
432 the postmating differentially expressed genes within a coevolved cross. This pattern indicates  
433 much of the non-coevolved postmating response is unique, supporting substantial and rapid  
434 coevolution between the male ejaculate and female reproductive tissues within each treatment that  
435 differs between sexual selection treatments. Such novel mismatches may have negative fitness  
436 consequences that could potentially contribute to the evolution of PMPZ reproductive isolation.

437 When contrasting the effect of the same female treatment when mated to different males (MMvME  
438 and EEvEM), differential expression in the female reproductive tract only occurred with M females  
439 mated to E males whereas in the ovaries, differential expression only occurred with E females  
440 mated to M males. In both cases, the differentially expressed genes were mainly non-congruent



441 and in such a way that the postmating response was more similar to one of the co-evolved  
442 crosses. We have previously found that when M females mate with E males, they increase the  
443 number of eggs laid earlier in their lifespan relative to E females mated to E males (Crudginton *et al.*  
444 *et al.* 2010). Whether the gene expression changes in the female reproductive tract at least partially  
445 explains sexual conflict over oviposition patterns remains to be determined. In the ovaries,  
446 mismatched gene expression was related to a variety of different biological processes, including  
447 oocyte development and regulation of antimicrobial peptide biosynthesis. To get a better idea of  
448 the overall impact of this diverse set of responses, we examined the cellular component  
449 enrichment, which included P body which is involved in mRNA metabolism and in *Drosophila*  
450 oogenesis (Lin *et al.*, 2008). Enrichment of molecular function was of mRNA 3'-UTR binding which  
451 may be involved in post-transcriptional gene expression regulation mediated by *trans*-acting  
452 factors and in which microRNAs guide-associated proteins towards the 3' UTRs of mRNAs to  
453 repress expression (Mayya and Duchaine 2019). miRNAs have been implicated in regulation of  
454 male and female fertility and ovary morphology (Chen *et al.*, 2014) and were recently shown to be  
455 involved in a number of postmating responses in *D. melanogaster* females (Fowler *et al.*, 2019).  
456 That these show mismatched expression changes in the ovary, potentially affecting female fertility,  
457 suggests that these alterations could negatively impact fitness resulting in postmating prezygotic  
458 reproductive isolation.

459 When contrasting the effect of the sexual selection treatment of the male-on-female postmating  
460 responses (MMvEM; EEvME) we again found differences between the female tissues. In the  
461 female reproductive tract, the main arena for postcopulatory sexual selection, the number of  
462 mismatched differentially expressed genes was 8x greater after mating with monandry males than  
463 polyandry males whereas in the ovaries, polyandry males caused 2x more differentially expressed  
464 genes than monandry males. In the female reproductive tract, more genes were upregulated after  
465 non-coevolved mating (M males with E females) than downregulated and in ovaries more genes  
466 were downregulated after a non-coevolved mating (E males with M females) than upregulated.  
467 However, in both the female reproductive tract and ovaries, genes upregulated when a E female  
468 mates with a M male are related to a large number of biological processes influencing DNA  
469 replication, and in the female reproductive tract these genes are non-congruent. This indicates  
470 that, while these responses are unique and mismatched in non-coevolved crosses, M males tend  
471 to cause postmating responses that makes the E female more M-like, although many of these  
472 genes do not show extreme changes in gene expression. In the ovaries, while E males mated to M  
473 females resulted in a large number of differentially expressed genes, the number of biological  
474 processes was limited, impacting eggshell assembly and immunity.

475 We often found changes to immune-related genes. Differential expression of *Drosophila* immune-  
476 related genes in response to mating in *D. melanogaster* have been shown previously (Lawniczak  
477 and Begun 2004; McGraw *et al.* 2004; 2008; Mack *et al.* 2006). Innoncenti and Morrow (2009)



478 have suggested that upregulation of immune genes after mating indicates males are immunogenic,  
479 arising from sexually antagonistic sexual interactions. Here we found that some of these genes are  
480 upregulated after mating, no matter what the sexual selection treatment. We also found that  
481 polyandry females had significant upregulation of some immune genes when virgin which were  
482 downregulated after mating. The upregulation of immune genes in virgin polyandry females may  
483 be in preparation for a manipulative or pathogenic ejaculate, and upregulation of some genes  
484 during courtship provides immunogenic benefits (Zhong et al. 2013). However, such priming does  
485 not always appear to benefit *D. melanogaster* females (McKean and Nunney 2005). In contrast,  
486 monandry females, who do not experience sexual conflict, upregulated immune genes only after  
487 mating. Thus some postmating expression changes in immune related genes are not immunogenic  
488 *sensu* Innocenti and Morrow (2009). Previous work examining the postmating response of females  
489 mated to heterospecific males identified immunogenic effects (Ahmed-Braimah *et al.* 2020). We  
490 found a consistent pattern in which gene expression of immune and stress related genes were  
491 either uniquely altered in non-coevolved matings or showed non-congruent changes. While we  
492 show immune-related genes frequently change expression during mating, alter expression patterns  
493 in response to sexual selection, and can be mismatched during non-coevolved crosses, how these  
494 gene expression changes affect fitness remains to be determined (Oku *et al.* 2019).

495 Changes in gene expression we identified here and in sex-biased gene expression in response to  
496 sexual selection (Veltsos et al. 2017) have recently been shown to associate with genomic  
497 divergence in these lines (Wiberg *et al.* in review). Sexual selection has been implicated in gene  
498 expression and genomic divergence in natural populations and our experimental evolution work  
499 supports rapid molecular evolution in response to sexual selection. Rapid coevolution of the  
500 molecular interactions, particularly in the female reproductive tract, as we see here, and the  
501 subsequent effect on the postmating response is thought to generate mismatches between male  
502 and female proteins necessary for successful fertilization (e.g., Ahmed-Braimah *et al.* 2020).  
503 Consequently, we found gene expression mismatches in matings between diverged populations,  
504 with the female reproductive tract being particularly sensitive. Such mismatches may form the  
505 basis of subsequent postmating prezygotic reproductive isolation. Our results, simultaneously  
506 comparing gene expression responses in multiple reproductive tissues and under mating system  
507 manipulation, highlight the complexity and rapid evolution of ejaculate-female interactions and their  
508 potential to influence population divergence.

509

## 510 **Material and methods**

### 511 **Experimental evolution lines**

512 The origin, establishment, and maintenance of the selection lines are described in detail elsewhere  
513 (Crudginton *et al.* 2005). Briefly, 50 wild-caught females of *D. pseudoobscura* from a population in  
514 Tucson, AZ USA were brought into the laboratory and reared for three generations, then four  
515 replicate lines of two different sexual selection treatments were established. We modified the  
516 opportunity for sexual selection by manipulating the adult sex ratio in food vials (2.5 x 80 mm) by  
517 either confining one female with a single male (enforced monogamy treatment; M) or one female  
518 with six males (“elevated” polyandry treatment; E). This species is naturally polyandrous with wild-  
519 caught females frequently being inseminated by at least two males at any given time (Anderson  
520 1974). We successfully equalized effective population sizes between the treatments (Snook *et al.*  
521 2009). At each generation, offspring were collected and pooled together within each replicate line  
522 for each treatment, and a sample from this pool was used to start the next non-overlapping  
523 generation in the appropriate sex ratios. Thus, this proportionally reflected the differential offspring  
524 production across families within a replicate and treatment. Generation time was 28 days and all  
525 populations were kept at 22°C on a 12L;12D cycle, with standard food media and added live yeast.  
526 Note that ‘monandry’ versus ‘polyandry’ as used here refers to the evolutionary history under which  
527 the individuals have evolved, not their current reproductive status.

## 528 **Sample preparation**

529 To generate experimental males and females, parents were collected from each replicate at  
530 generation 157-158. We standardized for maternal and larval environments as previously  
531 described (Crudginton *et al.* 2010). Briefly, parents were mated en masse in food bottles,  
532 transferred to containers with oviposition plates, allowed to oviposit for 24 h, and then 48 hr later,  
533 100 first instar larvae were seeded in standard food vials (Crudginton *et al.* 2010). Virgin males  
534 and females were collected under light CO<sub>2</sub> anesthesia on the day of eclosion and kept in vials of  
535 10 individuals for 5 days to ensure reproductive maturity (Snook and Markow 2001). On Day 5,  
536 within a 2 h window after lights turned on, one virgin female was placed in a food vial with one  
537 virgin male that was from either the same experimental replicate (“coevolved”; MM, EE where the  
538 first letter is the female) or the other treatment (“non-coevolved”; ME, EM). We dissected age- and  
539 circadian rhythm-matched virgin males and females from the same collections. Each treatment  
540 used 100 individuals, the tissues of which were equally split into 4 separate tubes, for easy  
541 pooling. For the mating treatments, males were put first in individual vials with fly food and allowed  
542 to settle. Females were then added, and were dissected 6 h after the first couple mated, in the  
543 order of mating, within a 2 h block. Dissections were performed under ether anaesthesia in RNA  
544 later (Ambion) on ice blocks. We separated the ovaries and the remainder of the female  
545 reproductive tract, including the sperm storage organs (seminal receptacle and spermathecae).  
546 We refer to these different female tissue sets as ovaries and the female reproductive tract. The  
547 male accessory glands and testes were dissected separately (ejaculatory bulbs were not included).  
548 All tissues were left at 4°C in RNA later for one day and then transferred to -80°C until RNA

549 extraction. Pools of 4 replicates of the E and M treatments, each containing tissues from 25  
550 individuals per replicate, were processed for RNA extraction using Trizol (Ambion) following the  
551 manufacturer's instructions. RNA extractions were cleaned up in Qiagen RNeasy kit columns  
552 according to the manufacturer's protocol, including the 15 min DNase treatment. The quality of  
553 RNA extractions was checked with Nanodrop and Bioanalyser.

## 554 **Sequencing and mapping**

555 The sample libraries were sequenced using an Illumina HiSeq 2000. Reads were mapped to the *D.*  
556 *pseudoobscura* genome v3.1, and indexed using bowtie2 (Langmead *et al.* 2009). Paired-end  
557 reads were aligned using option “-g 1 –library-type fr-secondstrand” with TopHat2.0.8b (which calls  
558 bowtie2.1.0; Kim *et al.* 2013). The option “-g 1” instructs TopHat2 to report the best alignment to  
559 the reference for a given read. Exon features were counted using HTSeq-count (Anders *et al.*  
560 2015) and the reads of all exons of each gene were combined to provide overall measures of gene  
561 expression.

## 562 **Statistical analyses**

563 We analysed the count data using edgeR v3.18.1 (Robinson *et al.* 2010) running in R v.3.4.0 (R  
564 Development Core Team, 2007). Libraries were normalised with the default edgeR normalisation  
565 procedure (TMM) and only genes with at least 3 counts per million across all libraries used in each  
566 analysis were retained. Dispersion was measured with default parameters using a negative  
567 binomial model using only the directly contrasted libraries. We performed different contrasts, but  
568 within each we tested for mean expression differences between the significantly upregulated and  
569 downregulated genes using Mann-Whitney rank tests using R v3.4.0 (R Development Core Team  
570 2007). We considered genes to be differentially expressed if they were below the 5% false  
571 discovery rate (FDR) threshold (Benjamini and Hochberg, 1995). We did not employ a log<sub>2</sub>FC  
572 threshold because allometry is unlikely to influence results obtained from specific tissues  
573 (Montgomery and Mank 2016).

574 We performed several different contrasts including between the lines for divergence in virgin gene  
575 expression in testes, accessory glands, ovaries, and female reproductive tract separately. Note  
576 that differential gene expression results are relative. For simplicity, figures report upregulated  
577 genes next to the name of each contrast; they can also be interpreted as downregulated genes for  
578 the opposite contrast. For example, 161 genes were upregulated in the testes of E males, which  
579 could also be interpreted as 161 genes downregulated in M testes. We also assessed divergence  
580 in the female postmating response by contrasting, within each sexual selection treatment,  
581 differential expression between virgin and mated ovaries and the female reproductive tract,  
582 separately. We consider the virgin gene expression status to be the baseline, so we can categorize  
583 changes as either upregulated after mating (gene expression is higher in mated compared to

584 virgin) or downregulated after mating (gene expression is higher in virgin compared to mated). We  
585 also investigated the effect of non-coevolved matings relative to coevolved matings, either focusing  
586 on the same female treatment but different male treatment (e.g. a contrast between either MM v  
587 ME or EE v EM, where the focal sex is unscored and females are always listed first) or on the  
588 same male treatment but different female treatment (i.e. MM v EM or EE v ME). These were  
589 conducted for both components of the female reproductive tissue. Here we consider the coevolved  
590 mating as a baseline, so we can categorize changes in gene expression in non-coevolved matings  
591 relative to the coevolved. Notation then is either that the non-coevolved postmating response has  
592 relatively higher or lower expression (the former indicated by, e.g., “EM up” and the later indicated  
593 by, e.g., “EM down”).

594 We identified gene subsets based on congruent and non-congruent response to sexual selection  
595 between the selection lines using venn diagrams, constructed using Venny 2.1 (Oliveros 2015).  
596 We performed GO enrichment analysis for all DE genes from all contrasts, and those identified  
597 from the venn diagrams, using topGO v2.22.0 with the weight01 algorithm option to account for  
598 GO topology (Alexa and Rahnenfuhrer 2010). Results with  $p < 0.05$  on Fisher’s exact tests,  
599 corrected for topology, were retained (Supplementary File 1).

600 For analysis of Sfps, we contrasted the distribution of the change in expression ( $\log_2FC$ ) of all  
601 genes, and differentially expressed genes between the selection lines from accessory glands using  
602 density plots. We made contrasts to the distribution of 3 Sfp-related gene subsets, identified from  
603 *D. pseudoobscura* proteomics (Karr *et al.* 2019). The largest subset was 3281 proteins produced in  
604 the accessory gland (“proteome”). Of these, 528 had protein secretory signals (“secretome”) and  
605 163 were also orthologous to *D. melanogaster* seminal fluid proteins (putative Sfps or  
606 “exoproteome”). Differences in the median expression differences between these sets were  
607 analysed with Wilcoxon tests, conducted in R v3.4.0 (R Development Core Team 2007).

## 608 **Acknowledgements**

609 This work was supported by the Natural Environment Research Council (NE/I014632/1  
610 to M.G.R., A.R.C., and R.R.S) and the Natural Environment Research Council Biomolecular  
611 Analysis Facility (NBAF654 to M.G.R.). The RNAseq data underlying this article have been  
612 submitted to ArrayExpress under accession number E-MTAB-10047. The scripts to reproduce the  
613 analysis are available at [https://osf.io/z7fm9/?view\\_only=054171ba3f534f839a0814fa1b8f9f61](https://osf.io/z7fm9/?view_only=054171ba3f534f839a0814fa1b8f9f61). We  
614 thank the many people that have contributed to the generation and maintenance of the  
615 experimental sexual selection lines in RRS’s lab and R Axel W Wiberg for help with dissections.

616 **Figures**

617 **Figure 1.** Differential gene expression (absolute  $\log_2FC$  changes, y axis) and number of  
618 significantly upregulated genes (numbers to the right of the ridge plot) when comparing monoandry  
619 (M) and polyandry (E) tissues of a) males and b) females.

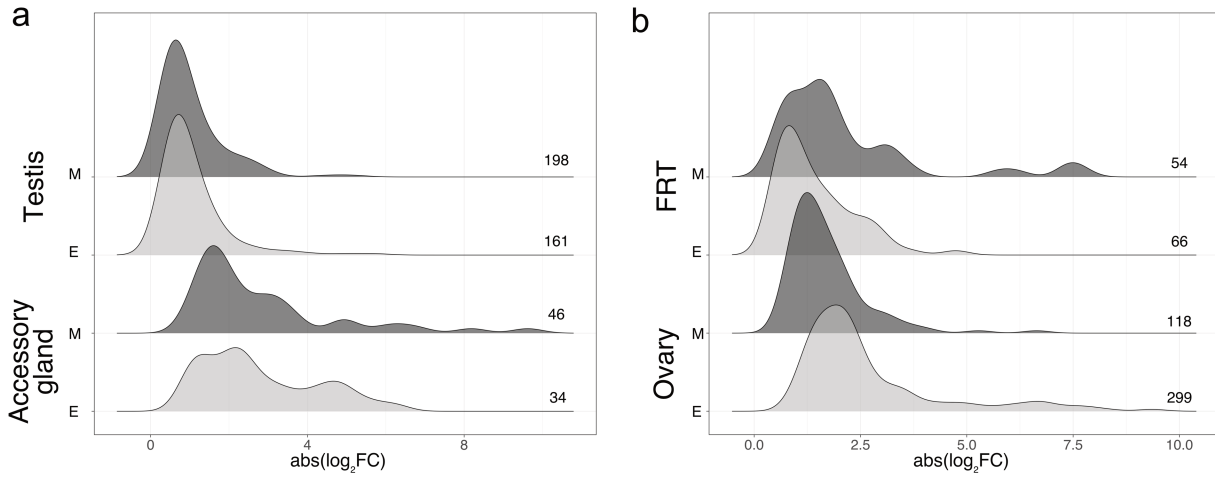

620

621 **Figure 2.** Effect of sexual selection on expression of genes coding for a) all and b) differentially  
622 expressed male accessory gland genes between polyandry (positive x axis values) and monandry  
623 (negative x-axis values) treatments. The line colours differentiate between independently  
624 categorized parts of the transcriptome as proteome, secretome or seminal fluid proteins (Karr *et al.*  
625 2019).

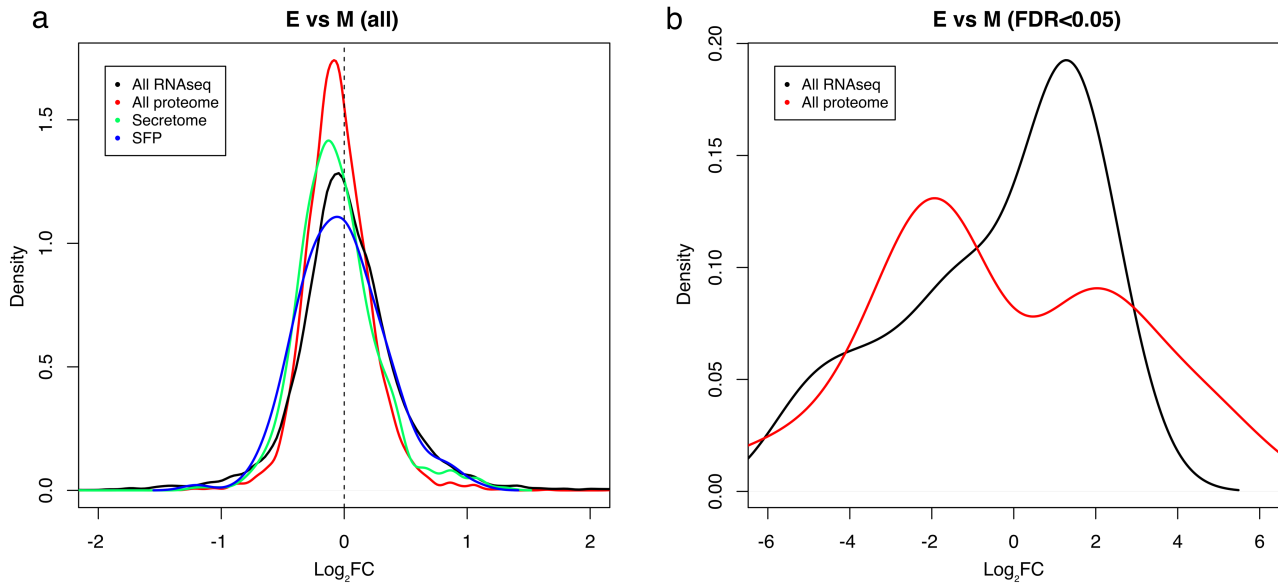

626



627 **Figure 3.** Postmating responses of differentially expressed genes ( $\log_2FC$ ) in the female  
 628 reproductive tracts (top; a-c) and ovaries (bottom; d-f). a,c) Within line mating contrasts showing  
 629 either upregulation (positive values) or downregulation (negative values) of genes following mating  
 630 within lines, either in monandry (x axis) or polyandry (y axis) females. Gene expression response  
 631 direction is defined relative to virgins. In panel a, a similar response (congruent) in both selection  
 632 lines is shown with a purple diagonal line, and a non-congruent response is shown with a red  
 633 diagonal line. Panel a and c legends indicate genes uniquely differentially expressed in the  
 634 monandry line (M) in yellow circles, those in the polyandry line (E) in blue circles and genes  
 635 differentially expressed in both selection lines (M+E) in green diamonds. Grey circles are genes  
 636 that are not differentially expressed. b,d) Same female, different male contrast showing either  
 637 upregulation (yellow triangle, red cross) or downregulation (purple triangle, blue plus) of genes  
 638 following mating with a non-coevolved male, focusing on the response within each female line.  
 639 Panel b and d legends show the female line in the first letter and the male line the second letter  
 640 (i.e., ME = monandry (M) female mated to polyandry (E) male; EM = polyandry female (E) mated  
 641 to monandry (M) male). Contrast made relative to relevant coevolved cross (i.e., for ME, contrast  
 642 with MM; for EM, contrast with EE). c,f) Different male, same female contrast showing either  
 643 upregulation (red triangle, yellow cross) or downregulation (blue triangle, purple plus) of genes  
 644 following mating with a non-coevolved male, focusing on the response of each male line. Panel c  
 645 and e legends show the female line in the first letter and the male line the second letter. Contrast  
 646 made relative to relevant coevolved cross (i.e., for ME, contrast with EE; for EM, contrast with  
 647 MM).

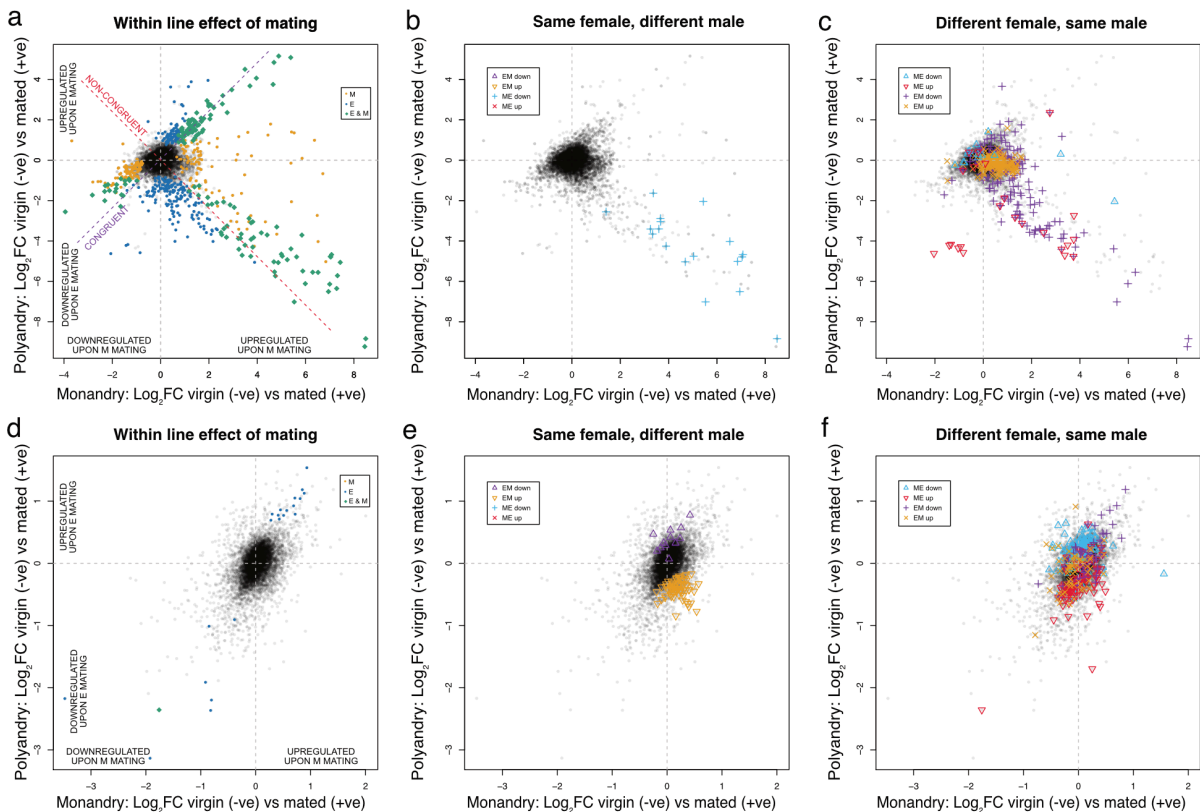

648

649 **References**

- 650 Ahmed-Braimah YH, Unckless RL, Clark AG. 2017. Evolutionary dynamics of male reproductive  
651 genes in the *Drosophila virilis* subgroup. *G3* 7:3145-3155.
- 652 Ahmed-Braimah YH, Wolfner MF, Clark AG. 2020. Differences in post-mating transcriptional  
653 responses between conspecific and heterospecific matings in *Drosophila*. *Mol Biol Evol*.  
654 doi:10.1093/molbev/msaa264
- 655 Anders S, Pyl PT, Huber W. 2015. HTSeq-a Python framework to work with high-throughput  
656 sequencing data. *Bioinformatics*. 31:166-169.
- 657 Anderson WW. 1974. Frequent multiple insemination in a natural population of *Drosophila*  
658 *pseudoobscura*. *Am Nat*. 108:709-711.
- 659 Alexa A, Rahnenfuhrer J. 2010. topGO: enrichment analysis for gene ontology. R package version.  
660 2
- 661 Arnqvist G, Rowe L. 2005. Sexual Conflict. New Jersey: Princeton University Press.
- 662 Avila FW, Ram KR, Qazi MCB, Wolfner MF. 2010. Sex peptide is required for the efficient release  
663 of stored sperm in mated *Drosophila* females. *Genetics*.186:595-600.
- 664 Avila FW, Mattei AL, Wolfner MF. 2015. Sex peptide receptor is required for the release of stored  
665 sperm by mated *Drosophila melanogaster* females. *J Insect Physiol*. 76:1-6.
- 666 Bath E, Bowden S, Peters C, Reddy A, Tobias JA, Easton-Calabria E, Seddon N, Goodwin SF,  
667 Wigby S. 2017. Sperm and sex peptide stimulate aggression in female *Drosophila*. *Nat*  
668 *Ecol Evol*. 1:0154.
- 669 Benjamini Y, Hochberg Y. 1995. Controlling the false discovery rate: a practical and powerful  
670 approach to multiple testing. *J Roy Stat Soc B*. 57:289-300.
- 671 Bono JM, Matzkin LM, Kelleher ES, Markow TA. 2011. Postmating transcriptional changes in  
672 reproductive tracts of con- and heterospecifically mated *Drosophila mojavensis* females.  
673 *Proc Natl Acad Sci U S A*. 108:7878-7883.
- 674 Carvalho GB, Kapahi P, Anderson DJ, Benzer S. 2006. Allocrine modulation of feeding behavior  
675 by the sex peptide of *Drosophila*. *Curr Biol*. 16:692-696.
- 676 Chapman T, Bangham J, Vinti G, Seifried B, Lung O, Wolfner MF, Smith HK, Partridge L. 2003.  
677 The sex peptide of *Drosophila melanogaster*: female post-mating responses analyzed by  
678 using RNA interference. *Proc Natl Acad Sci U S A*. 100:9923-9928.
- 679 Chen YW, Song S, Weng R, Verma P, Kugler JM, Buescher M, Rouam S, Cohen SM. 2014.  
680 Systematic study of *Drosophila* microRNA functions using a collection of targeted knockout  
681 mutations. *Dev Cell*. 31:784-800.
- 682 Cheng C, Kirkpatrick M. 2016. Sex-specific selection and sex-biased gene expression in humans  
683 and flies. *PLoS Genet*. 12:e1006170.
- 684 Cognigni P, Bailey AP, Miguel-Aliaga I. 2011. Enteric neurons and systemic signals couple  
685 nutritional and reproductive status with intestinal homeostasis. *Cell Metab*. 13:92-104.

- 686 Coyne JA, Orr HA. 2004. Speciation. Massachusetts: Sinauer Associates.
- 687 Crudgington HS, Beckerman AP, Brüstle L, Green K, Snook RR. 2005. Experimental removal and  
688 elevation of sexual selection: does sexual selection generate manipulative males and  
689 resistant females? *Am Nat.* 165:S72-S87.
- 690 Crudgington HS, Fellows S, Badcock NS, Snook RR. 2009. Experimental manipulation of sexual  
691 selection promotes greater male mating capacity but does not alter sperm investment.  
692 *Evolution.* 63:926-938.
- 693 Crudgington HS, Fellows S, Snook RR. 2010. Increased opportunity for sexual conflict promotes  
694 harmful males with elevated courtship frequencies. *J Evol Biol.* 23:440-446.
- 695 Debelle A, Ritchie MG, Snook RR. 2014. Evolution of divergent female mating preference in  
696 response to experimental sexual selection. *Evolution.* 68:2524-2533.
- 697 Debelle A, Ritchie MG, Snook RR. 2016. Sexual selection and assortative mating: an experimental  
698 test. *J Evol Biol.* 29:1307-1316.
- 699 Delbare SYN, Chow CY, Wolfner MF, Clark AG. 2017. Roles of female and male genotype in post-  
700 mating responses in *Drosophila melanogaster*. *J Hered.* 108:740-753.
- 701 Ellegren H, Parsch J. 2007. The evolution of sex-biased genes and sex-biased gene expression.  
702 *Nat Rev Genet.* 8:689-698.
- 703 Elphick MR, Mirabeau O, Larhammar D. 2018. Evolution of neuropeptide signalling systems. *J Exp*  
704 *Biol.* 221:jeb.151092
- 705 Fowler EK, Bradley T, Moxon S, Chapman T. 2019. Divergence in transcriptional and regulatory  
706 responses to mating in male and female fruitflies. *Scientific Reports.* 9:1-15.
- 707 Garlovsky MD, Yusuf LH, Ritchie MG, Snook RR. 2020. Within-population sperm competition  
708 intensity does not predict asymmetry in conpopulation sperm precedence. *Phil Trans Roy*  
709 *Soc B.* 375:20200071.
- 710 Harrison PW, Wright AE, Zimmer F, Dean R, Montgomery SH, Pointer MA, Mank JE. 2015. Sexual  
711 selection drives evolution and rapid turnover of male gene expression. *Proc Natl Acad Sci*  
712 *U S A.* 112:4393-4398.
- 713 Heifetz Y, Wolfner MF. 2004. Mating, seminal fluid components, and sperm cause changes in  
714 vesicle release in the *Drosophila* female reproductive tract. *Proc Natl Acad Sci U S A.*  
715 101:6261-6266.
- 716 Holland B, Rice WR. 1999. Experimental removal of sexual selection reverses intersexual  
717 antagonistic coevolution and removes a reproductive load. *Proc Natl Acad Sci U S A.*  
718 96:5083-5088.
- 719 Hollis B, Houle D, Yan Z, Kawecki TJ, Keller L. 2014. Evolution under monogamy feminizes gene  
720 expression in *Drosophila melanogaster*. *Nat Commun.* 5:3482.
- 721 Hollis B, Houle D, Kawecki TJ. 2016. Evolution of reduced post-copulatory molecular interactions  
722 in *Drosophila* populations lacking sperm competition. *J Evol Biol.* 29:77-85.

- 723 Hollis B, Koppik M, Wensing KU, Ruhmann H, Genzoni E, Erkosar B, Kawecki TJ, Fricke C, Keller  
724 L. 2019. Sexual conflict drives male manipulation of female postmating responses in  
725 *Drosophila melanogaster*. *Proc Natl Acad Sci U S A*. 116:8437-8444.
- 726 Hosken DJ, Ward PI. 2001. Experimental evidence for testis size evolution via sperm competition.  
727 *Ecol Lett*. 4:10-13.
- 728 Hosken DJ, Garner TWJ, Ward PI. 2001. Sexual conflict selects for male and female reproductive  
729 characters. *Curr Biol*. 11:489-493.
- 730 Immonen E, Snook RR, Ritchie MG. 2014. Mating system variation drives rapid evolution of the  
731 female transcriptome in *Drosophila pseudoobscura*. *Ecol Evol*. 4:2186-2201.
- 732 Innocenti P, Morrow EH. 2009. Immunogenic males: a genome-wide analysis of reproduction and  
733 the cost of mating in *Drosophila melanogaster* females. *J Evol Biol*. 22:964-973.
- 734 Innocenti P, Flis I, Morrow EH. 2014. Female responses to experimental removal of sexual  
735 selection components in *Drosophila melanogaster*. *BMC Evol Biol*. 14:239.
- 736 Kim D, Perteza G, Trapnell C, Pimentel H, Kelley R, Salzberg SL. 2013. TopHat2: accurate  
737 alignment of transcriptomes in the presence of insertions, deletions and gene fusions.  
738 *Genome Biol*. 14:R36.
- 739 Kapelnikov A, Zelinger E, Gottlieb Y, Rhrissorakrai K, Gunsalus KC, Heifetz Y. 2008. Mating  
740 induces an immune response and developmental switch in the *Drosophila* oviduct. *Proc*  
741 *Natl Acad Sci U S A*. 105:13912-13917.
- 742 Karr TL, Southern H, Rosenow MA, Gossman TI, Snook RR. 2019. The old and the new:  
743 Discovery proteomics identifies putative novel seminal fluid proteins in *Drosophila*. *Mol Cell*  
744 *Proteo*. 18:S23-S33.
- 745 Langmead B, Trapnell C, Pop M, Salzberg SL. 2009. Ultrafast and memory-efficient alignment of  
746 short DNA sequences to the human genome. *Genome Biol*. 10:R25.
- 747 Lawniczak MK, Begun DJ. 2004. A genome-wide analysis of courting and mating responses in  
748 *Drosophila melanogaster* females. *Genome*. 47:900-910.
- 749 Librado P, Rozas J. 2016. Weak polygenic selection drives the rapid adaptation of the  
750 chemosensory system: Lessons from the upstream regions of the major gene families.  
751 *Genome Biol Evol*. 8:2493-2504.
- 752 Lin MD, Jiao X, Grima D, Newbury SF, Kiledjian M, Chou TB. 2008. *Drosophila* processing bodies  
753 in oogenesis. *Dev Biol*. 322:276-288.
- 754 Linklater JR, Wertheim B, Wigby S, Chapman T. 2007. Ejaculate depletion patterns evolve in  
755 response to experimental manipulation of sex ratio in *Drosophila melanogaster*. *Evolution*.  
756 61:2027-2034
- 757 Lüpold S, Linz GM, Rivers JW, Westneat DF, Birkhead TR. 2009. Sperm competition selects  
758 beyond relative testes size in birds. *Evolution*. 63:391-402.
- 759 Mack PD, Kapelnikov A, Heifetz Y, Bender M. 2006. Mating-responsive genes in reproductive  
760 tissues of female *Drosophila melanogaster*. *Proc Natl Acad Sci U S A*. 103:10358-10363.

- 761 Manier MK, Lüpold S, Belote JM, Starmer WT, Berben KS, Ala-Honkola O, Collins WF, Pitnick S.  
762 2013. Postcopulatory sexual selection generates speciation phenotypes in *Drosophila*. *Curr*  
763 *Biol.* 23:1853-1862.
- 764 Mank JE. 2017. The transcriptional architecture of phenotypic dimorphism. *Nat Ecol Evol.* 1:0006.
- 765 Markow TA. 1997. Assortative fertilization in *Drosophila*. *Proc Natl Acad Sci U S A.* 94:7756-7760.
- 766 Matute DR, Coyne JA. 2010. Intrinsic reproductive isolation between two sister species of  
767 *Drosophila*. *Evolution.* 64:903-920.
- 768 Mayya VK, Duchaine TF. 2019. Ciphers and executioners: How 3'-untranslated regions determine  
769 the fate of messenger RNAs. *Front Genet.* 10:6.
- 770 McGraw LA, Clark AG, Wolfner MF. 2008. Post-mating gene expression profiles of female  
771 *Drosophila melanogaster* in response to time and to four male accessory gland proteins.  
772 *Genetics.* 179:1395-1408.
- 773 McGraw LA, Gibson G, Clark AG, Wolfner MF. 2004. Genes regulated by mating, sperm, or  
774 seminal proteins in mated female *Drosophila melanogaster*. *Curr Biol.* 14:1509-1514.
- 775 McKean KA, Nunney L. 2005. Bateman's principle and immunity: phenotypically plastic  
776 reproductive strategies predict changes in immunological sex differences. *Evolution.*  
777 59:1510-1517.
- 778 Montgomery SH, Mank JE. 2016. Inferring regulatory change from gene expression: the  
779 confounding effects of tissue scaling. *Mol Ecol.* 25:5114-5128.
- 780 Niepielko MG, Ip K, Kanodia JS, Lun DS, Yakoby N. 2012. Evolution of BMP signaling in  
781 *Drosophila* oogenesis: a receptor-based mechanism. *Biophys J.* 102:1722-1730.
- 782 Oku K, Price TAR, Wedell N. 2019. Does mating negatively affect female immune defences in  
783 insects? *Ani Biol.* 69:117-136.
- 784 Oliveros, J.C. 2007-2015 Venny. An interactive tool for comparing lists with Venn's  
785 diagrams. <http://bioinfogp.cnb.csic.es/tools/venny/index.html>
- 786 Parker DJ, Bast J, Jalvingh K, Dumas Z, Robinson-Rechavi M, Schwander T. 2019. Sex-biased  
787 gene expression is repeatedly masculinized in asexual females. *Nature Commun.* 10:1-11.
- 788 Pitnick S, Hosken DJ, Birkhead TR. 2008. Sperm biology: an evolutionary perspective.  
789 Massachusetts: Academic Press.
- 790 Pitnick S, Miller GT, Reagan J, Holland B. 2001. Males' evolutionary responses to experimental  
791 removal of sexual selection. *Proc Roy Soci Biol B.* 268:1071-1080.
- 792 Pizzari T, Snook RR. 2003. Perspective: sexual conflict and sexual selection: chasing away  
793 paradigm shifts. *Evolution.* 57:1223-1236.
- 794 Prokupek AM, Kachman SD, Ladunga I, Harshman LG. 2009. Transcriptional profiling of the sperm  
795 storage organs of *Drosophila melanogaster*. *Insect Mol Biol.* 18:465-475.
- 796 Pröschel M, Zhang Z, Parsch J. 2006. Widespread adaptive evolution of *Drosophila* genes with  
797 sex-biased expression. *Genetics.* 174:893.



- 798 R Development Core Team. 2007 R: A language and environment for statistical computing,  
799 Vienna, Austria. ISBN 3-900051-07-0, URL <http://www.R-project.org>. R-project.org
- 800 Reuter M, Linklater JR, Lehmann L, Fowler K, Chapman T, Hurst GD. 2008. Adaptation to  
801 experimental alterations of the operational sex ratio in populations of *Drosophila*  
802 *melanogaster*. *Evolution*. 62:401-412.
- 803 Rice WR. 1996. Sexually antagonistic male adaptation triggered by experimental arrest of female  
804 evolution. *Nature*. 381:232-234.
- 805 Ribeiro C, Dickson BJ. 2010. Sex peptide receptor and neuronal TOR/S6K signaling modulate  
806 nutrient balancing in *Drosophila*. *Curr Biol*. 20:1000-1005.
- 807 Robinson MD, McCarthy DJ, Smyth GK. 2010. edgeR: a Bioconductor package for differential  
808 expression analysis of digital gene expression data. *Bioinformatics*. 26:139-140.
- 809 Rowe L, Cameron E, Day T. 2003. Detecting sexually antagonistic coevolution with population  
810 crosses. *Proc Roy Soc Biol B*. 270:2009-2016.
- 811 Sirot LK, Wong A, Chapman T, Wolfner MF. 2015. Sexual conflict and seminal fluid proteins: a  
812 dynamic landscape of sexual interactions. *Cold Spring Harbor Perspectives in Biology*.  
813 7:a017533.
- 814 Snook RR, Markow TA. 2000. Mating system evolution in sperm-heteromorphic *Drosophila*. *J*  
815 *Insect Physiol*. 47:957-964.
- 816 Snook RR, Robertson A, Crudginton HS, Ritchie MG. 2005. Experimental manipulation of sexual  
817 selection and the evolution of courtship song in *Drosophila pseudoobscura*. *Behavior*  
818 *Genetics*. 35:245-255.
- 819 Snook RR, Brüstle L, Slate J. 2009. A test and review of the role of effective population size on  
820 experimental sexual selection patterns. *Evolution*. 63:1923-1933.
- 821 Snook RR, Markow TA, Karr TL. 1994. Functional nonequivalence of sperm in *Drosophila*  
822 *pseudoobscura*. *Proc Natl Acad Sci U S A*. 91:11222-11226.
- 823 Veltsos P, Fang Y, Cossins AR, Snook RR, Ritchie MG. 2017. Mating system manipulation and the  
824 evolution of sex-biased gene expression in *Drosophila*. *Nat Commun*. 8:2072.
- 825 Vrablik TL, Watts JL. 2013. Polyunsaturated fatty acid derived signaling in reproduction and  
826 development: Insights from *Caenorhabditis elegans* and *Drosophila melanogaster*. *Mol*  
827 *Reprod Dev*. 80:244-259.
- 828 Wolfner MF. 2009. Battle and ballet: molecular interactions between the sexes in *Drosophila*. *J*  
829 *Hered*. 100:399-410.
- 830 Wiberg RAW, Veltsos P, Snook RR, Ritchie, MG. In review. Experimental evolution supports  
831 signatures of sexual selection in genomic divergence. *Evol. Lett.* (a previous version on  
832 biorxiv: <https://doi.org/10.1101/2020.09.07.285650>)
- 833 Wigby S, Chapman T. 2004. Female resistance to male harm evolves in response to manipulation  
834 of sexual conflict. *Evolution*. 58:1028-1037



- 835 Wright AE, Rogers TF, Fumagalli M, Cooney CR, Mank JE. 2019. Phenotypic sexual dimorphism  
836 is associated with genomic signatures of resolved sexual conflict. *Mol Ecol.* 28:2860-2871.
- 837 Zhang Y, Sturgill D, Parisi M, Kumar S, Oliver B. 2007. Constraint and turnover in sex-biased gene  
838 expression in the genus *Drosophila*. *Nature.* 450:233-237.
- 839 Zhong, W., McClure, C.D., Evans, C.R., Miynski, D.T., Immonen, E., Ritchie, M.G. & Priest, N.K.  
840 2013. Immune anticipation in *Drosophila*: Turandot M promotes immunity against sexually  
841 transmitted fungal infections. *Proc Roy Soc Biol B* 280: 20132018

842 **Supplementary Files**

843 **Supplementary File 1.** Summary of gene ontology enrichment analysis for genes and all  
844 contrasts, shown in Figures 1 and 3 (and Figures S1-3). The order of the tabs in the file  
845 corresponds to the order of appearance of the genes in the Figures. Each tab shows all DE genes,  
846 and separately upregulated and downregulated genes. Tab names refer to Figure, tissue and  
847 contrast. Contrast names refer to the polyandry (E) and monogamous (M) lines. The virgin  
848 treatment is represented by the letter indicating the selection line, while the mated treatment is  
849 represented by two letters, starting with the sexual selection line of the female and followed by the  
850 male partner (i.e., “EM” indicates the E females mated with M males).

851

852 **Figure S1.** Differential gene expression (absolute  $\log_2FC$  changes, y axis) and number of  
 853 significantly upregulated (Up) or downregulated (Down) genes (numbers to the right of the ridge  
 854 plot) when comparing the postmating response in the female reproductive tract (FRT) or ovaries  
 855 (Ovary) in monandry (M) crosses and in polyandry (E) crosses. The direction of gene expression is  
 856 defined relative to mated females (e.g. Down means the mated female had significantly lower  
 857 expression than in the virgin status; Up means the mated female had significantly higher  
 858 expression than in the virgin status).

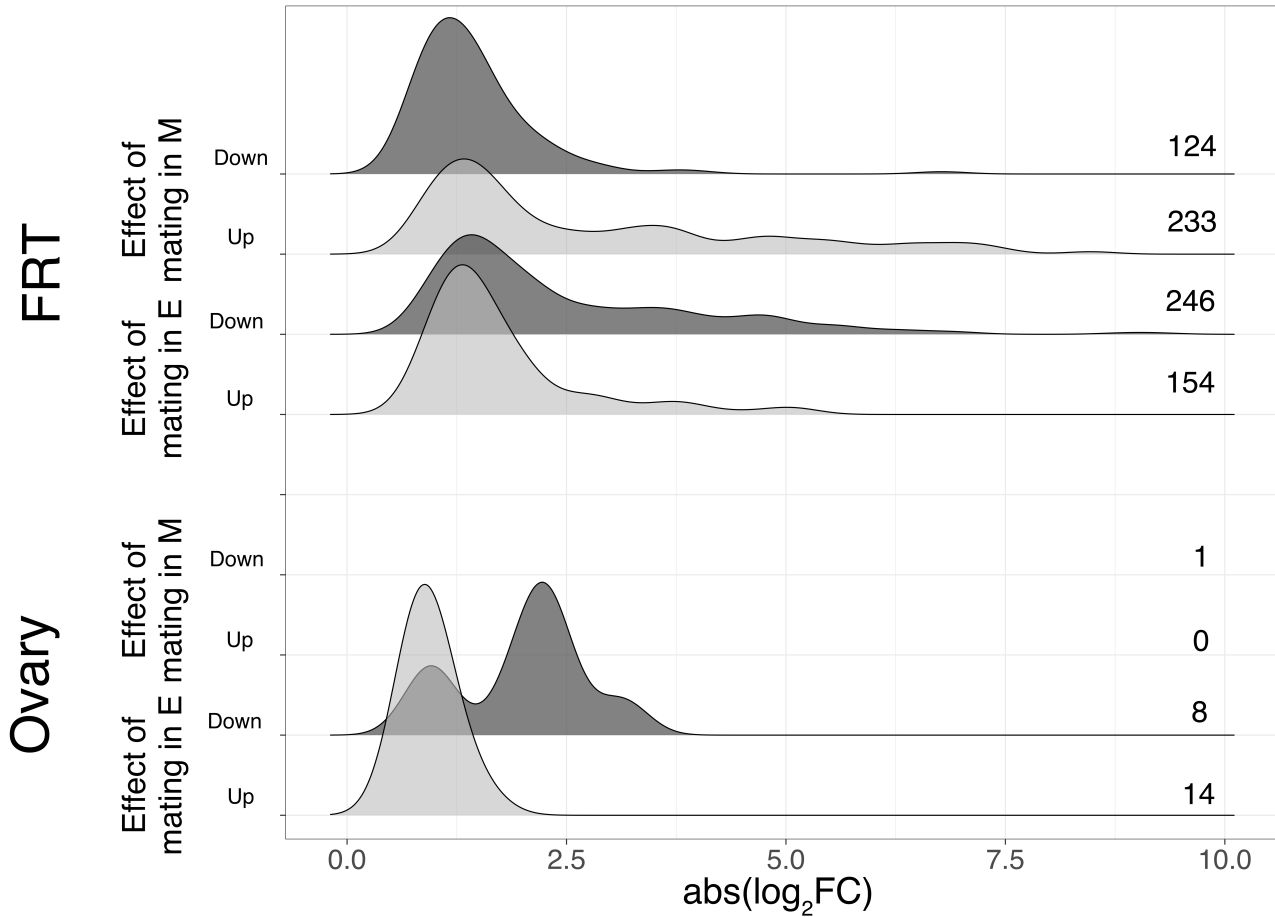

859

860 **Figure S2.** Differential gene expression (absolute  $\log_2FC$  changes, y axis) and number of  
 861 significantly upregulated (Up) or downregulated (Down) genes (numbers to the right of the ridge  
 862 plot) when comparing the postmating response in the female reproductive tract (FRT) or ovaries  
 863 (Ovary) for the female effect (i.e., when a monandry (M) female is mated to a polyandry (E) male  
 864 (Effect of male to M female), or when a polyandry female (E) is mated to a monandry (M) male  
 865 (Effect of male to the E female)). The direction of gene expression is defined relative to the  
 866 relevant coevolved cross (e.g. Down means the female mated to the non-coevolved male (i.e.,  
 867 either ME or EM) had significantly lower expression than when mated to a coevolved male (i.e.,  
 868 MM or EE, respectively); Up means the female mated to non-coevolved male had significantly  
 869 higher expression than when mated to a coevolved male).

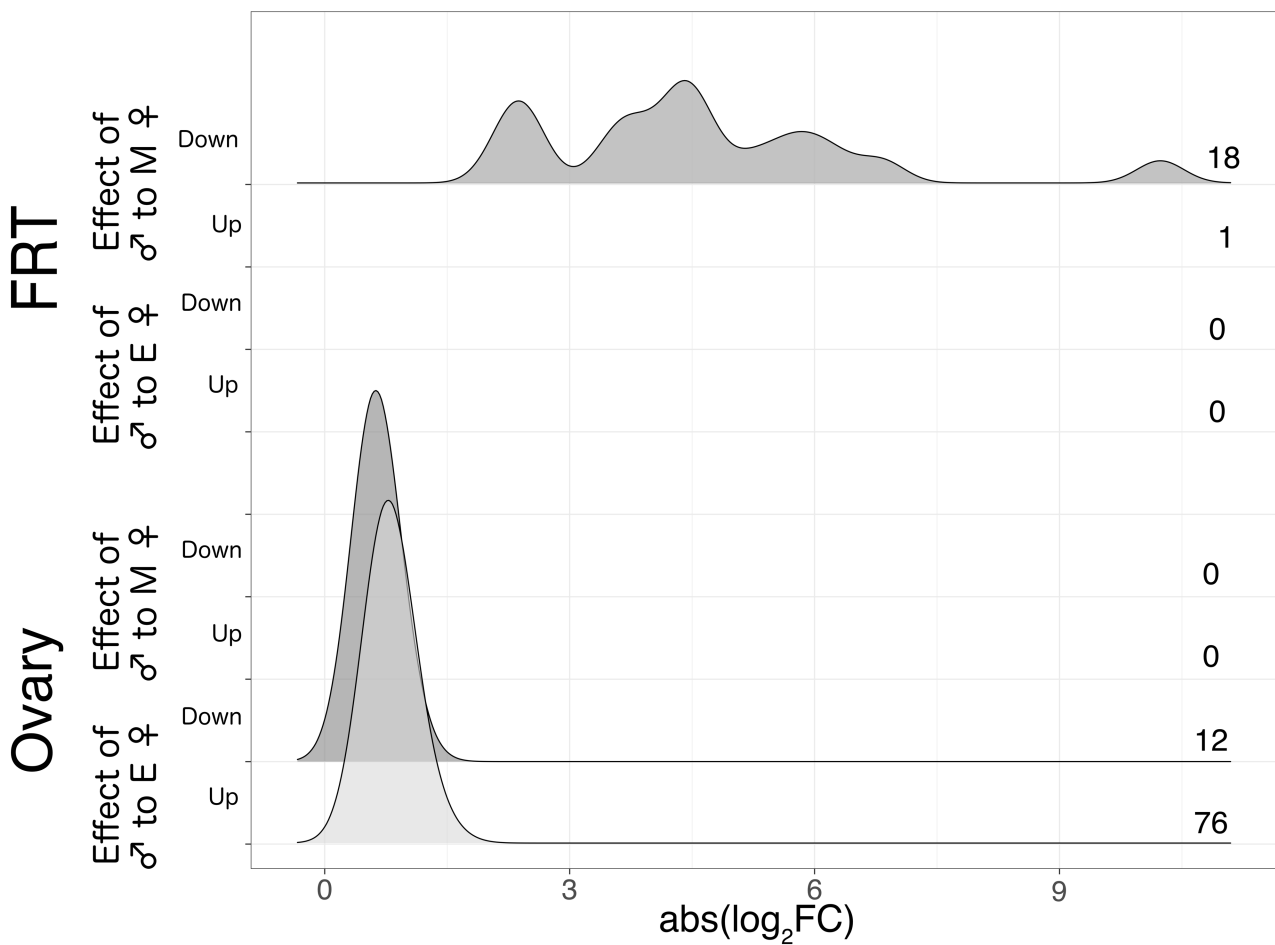

870

871 **Figure S3.** Differential gene expression (absolute  $\log_2FC$  changes, y axis) and number of  
 872 significantly upregulated (Up) or downregulated (Down) genes (numbers to the right of the ridge  
 873 plot) when comparing the postmating response in the female reproductive tract (FRT) or ovaries  
 874 (Ovary) for the male effect (i.e., when a polyandry (E) female is mated to a monandry (M) male  
 875 (Effect of M male), or when a monandry female (M) is mated to a polyandry (E) male (Effect of E  
 876 male)). The direction of gene expression is defined relative to the relevant coevolved cross (e.g.  
 877 Down means a female mated to the non-coevolved male (i.e., either EM or ME) had significantly  
 878 lower expression than when mated to a coevolved male (i.e., MM or EE, respectively); Up means  
 879 the female mated to non-coevolved male had significantly higher expression than when mated to a  
 880 coevolved male).

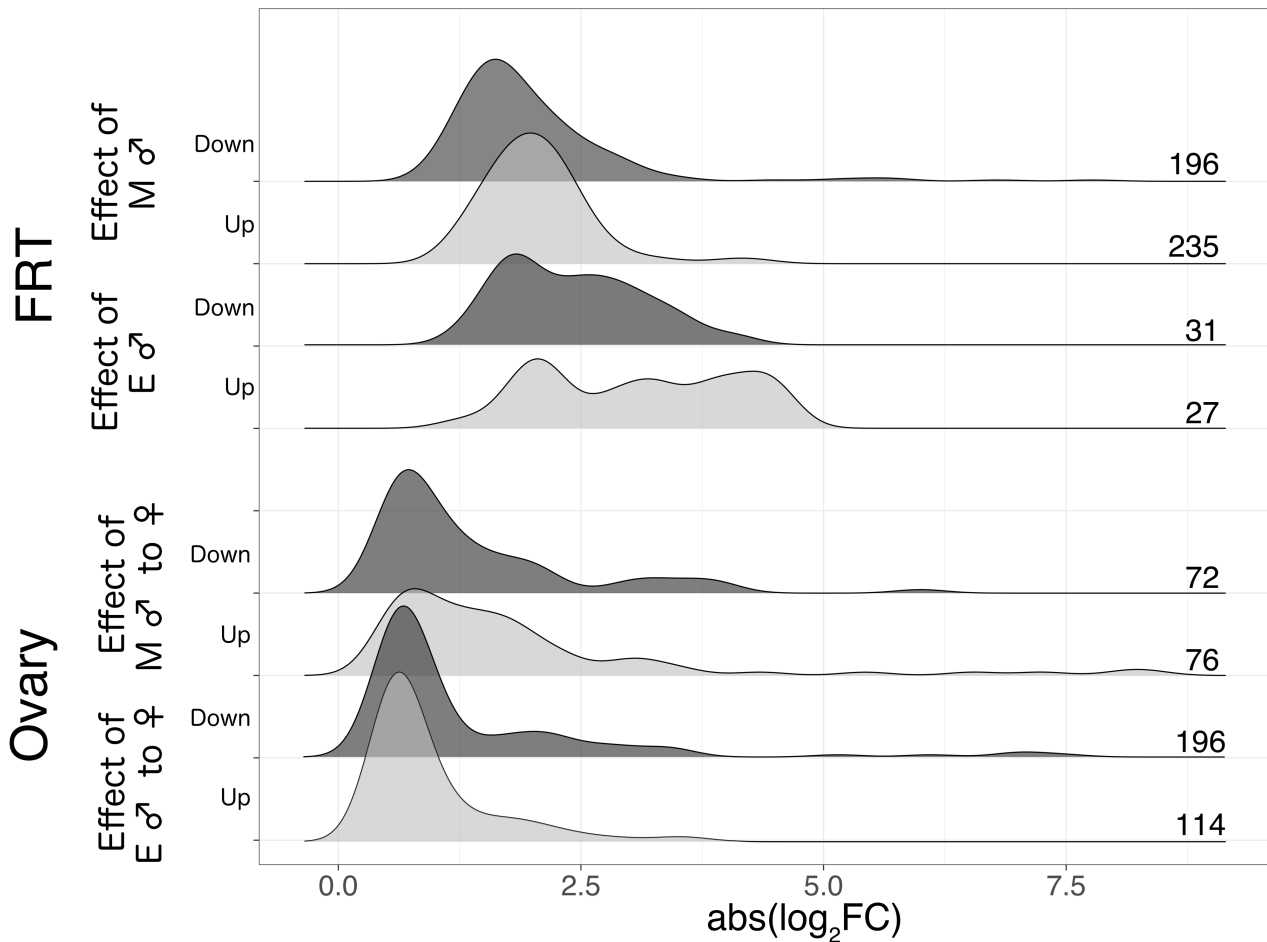

881

882
